# Supplementary material
Source: MDPI journal article supplement (https://www.mdpi.com/1999-4907/16/5/808)

# Holocene forest dynamics in western Mediterranean islands: rates, periodicity, and trends

Fabrizio Michelangeli<sup>1\*</sup>, Elisa De Luca<sup>1</sup>, Donatella Magri<sup>1</sup>, Simone De Santis<sup>1</sup>, Alessandra Celant<sup>1</sup>, Matthieu Ghilardi<sup>2</sup>, Matteo Vacchi<sup>3</sup>, Jordi Revellés<sup>4</sup>, Rita Teresa Melis<sup>5</sup>, Juan Ochando<sup>1,6</sup>, José S. Carrión<sup>7</sup>, Roberta Pini<sup>8</sup>, Gabriel Servera-Vives<sup>9</sup>, and Federico Di Rita<sup>1\*</sup>

<sup>1</sup> Department of Environmental Biology, Sapienza University of Rome, Piazzale Aldo Moro 5, 00185 Rome, Italy

<sup>2</sup> CEREGE, CNRS-AMU-IRD-Collège de France-INRAE, Aix-en-Provence, France

<sup>3</sup> Department of Earth Sciences, Università di Pisa, Pisa, Italy

<sup>4</sup> Institut Català de Paleoeologia Humana i Evolució Social (IPHES-CERCA), Zona Educacional 4, Campus Sescelades URV (Edifici W3), 43007 Tarragona (Spain)/ Universitat Rovira i Virgili, Departament d'Història i Història de l'Art, Av. de Catalunya 35, 43002 Tarragona, Spain

<sup>5</sup> Department of Chemical and Geological Sciences, University of Cagliari, Monserrato, 09042, Cagliari, Italy

<sup>6</sup> Department of Physical sciences, Earth and environment, University of Siena, Strada Laterina, 8, 53100 Siena, Italy

<sup>7</sup> Department of Plant Biology (Botany Area), Faculty of Biology, University of Murcia, Campus de Espinardo, 30100 Murcia, Spain

<sup>8</sup> CNR – IGAG, Lab. of Palynology and Palaeoecology, Piazza della Scienza 1, 20126 Milano (I), Italy

<sup>9</sup> ArqueoUIB, Departament de Ciències Històriques i Teoria de les Arts. Universitat de les Illes Balears

Correspondence: fabrizio.michelangeli@uniroma1.it; federico.dirita@uniroma1.it

## Supplementary Figure S1

Synthetic pollen percentage diagrams of the 25 selected sites from large western Mediterranean islands. Red lines and green circles indicate peaks in RoCs estimates. Mediterranean forest in green, mesophilous forest in brown, herbs in yellow, cultivated trees and cereals in orange. Additional magnification of low-value curves are indicated in the labels (x5).

# Sicily

## Gorgo Tondo

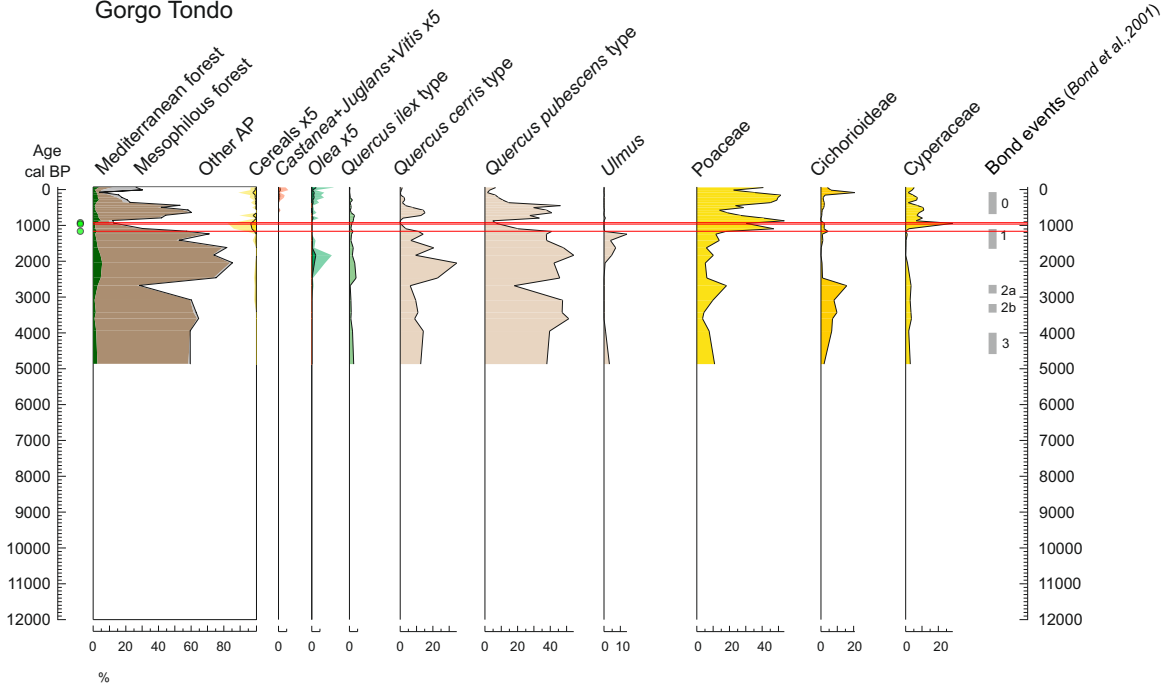

## Urgo Pietra Giordano

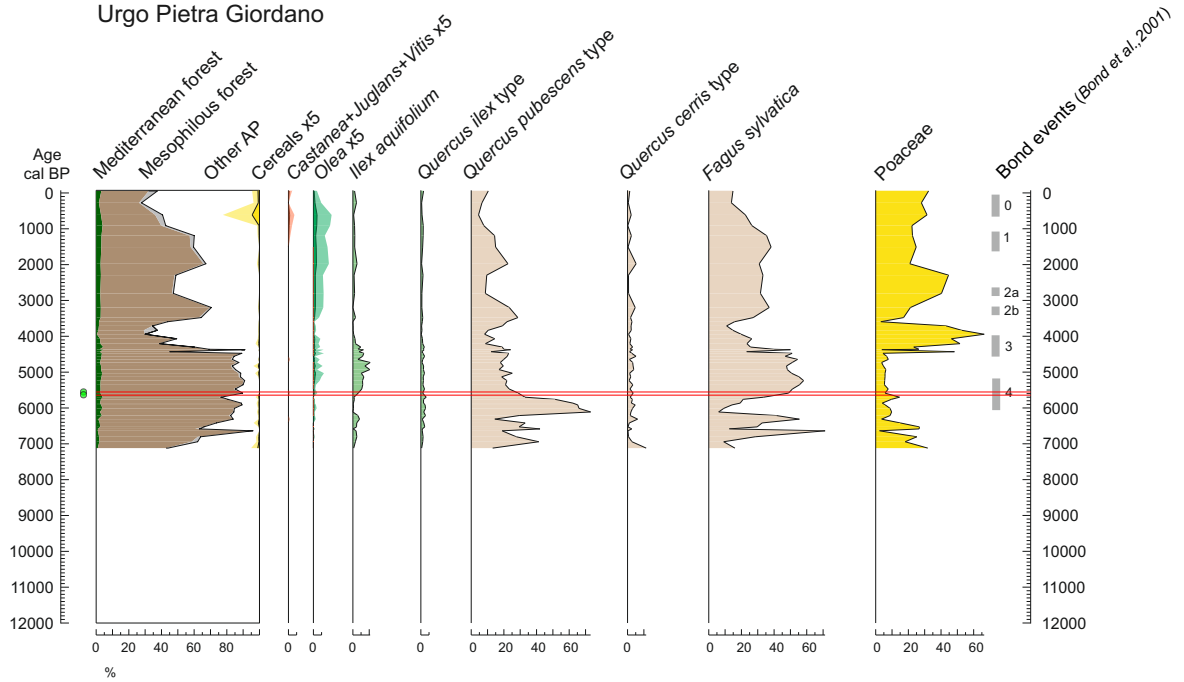

## Gorgo Lungo

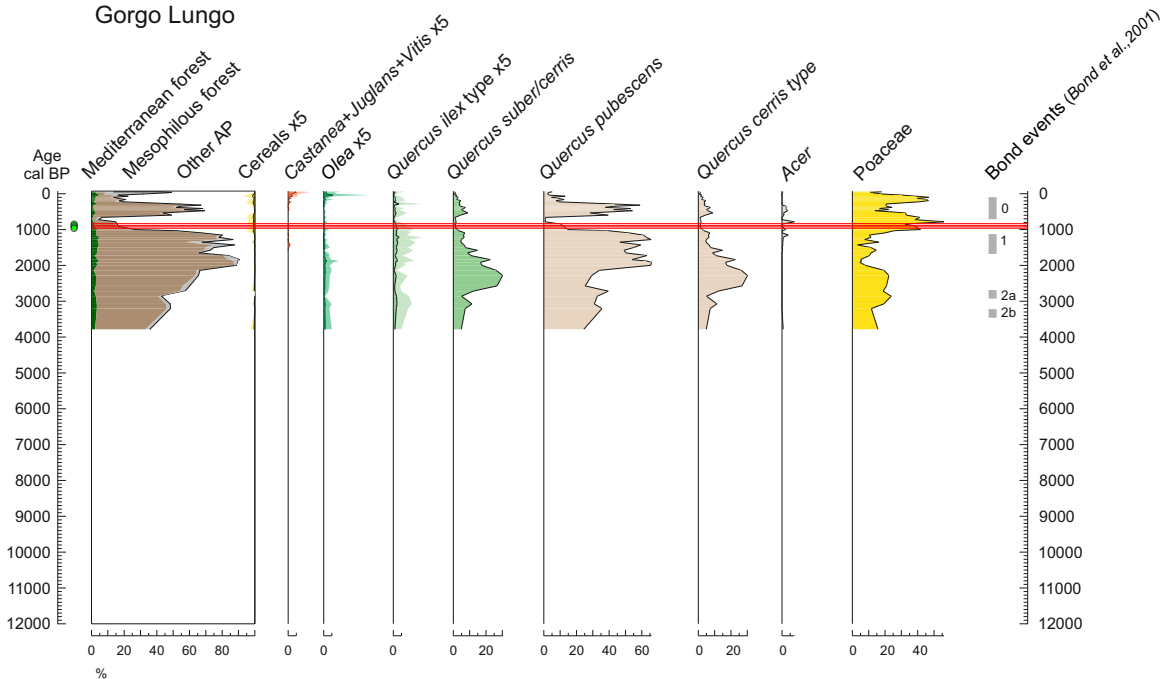

## Lago Preola

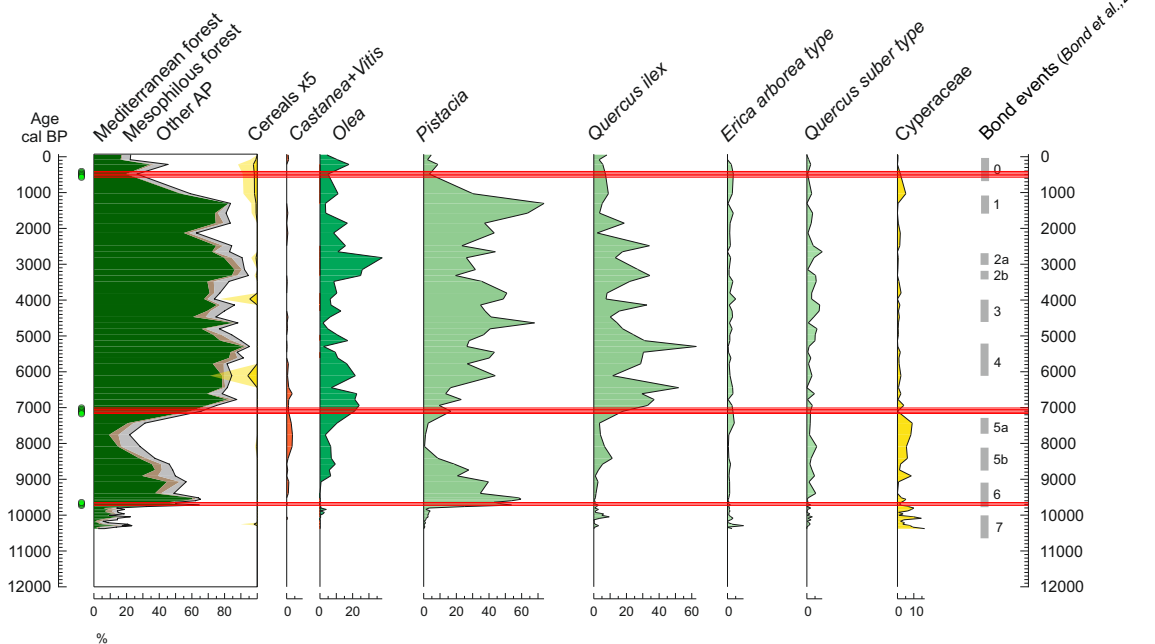

Urio Quattrocchi

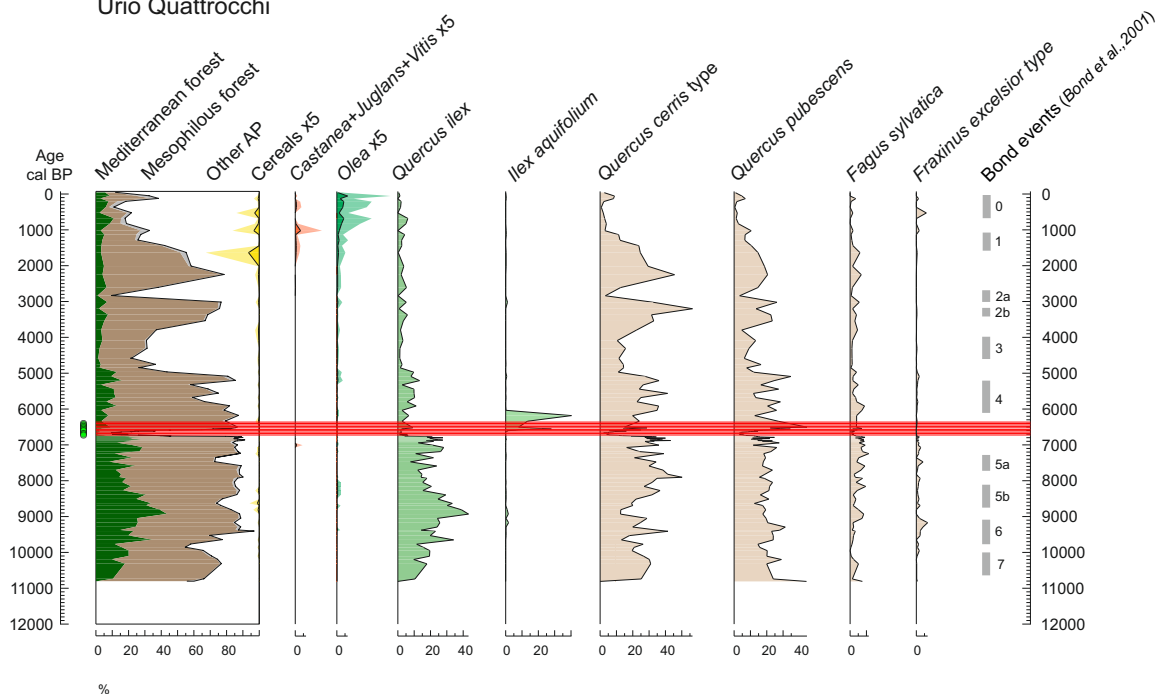

Gorgo Basso

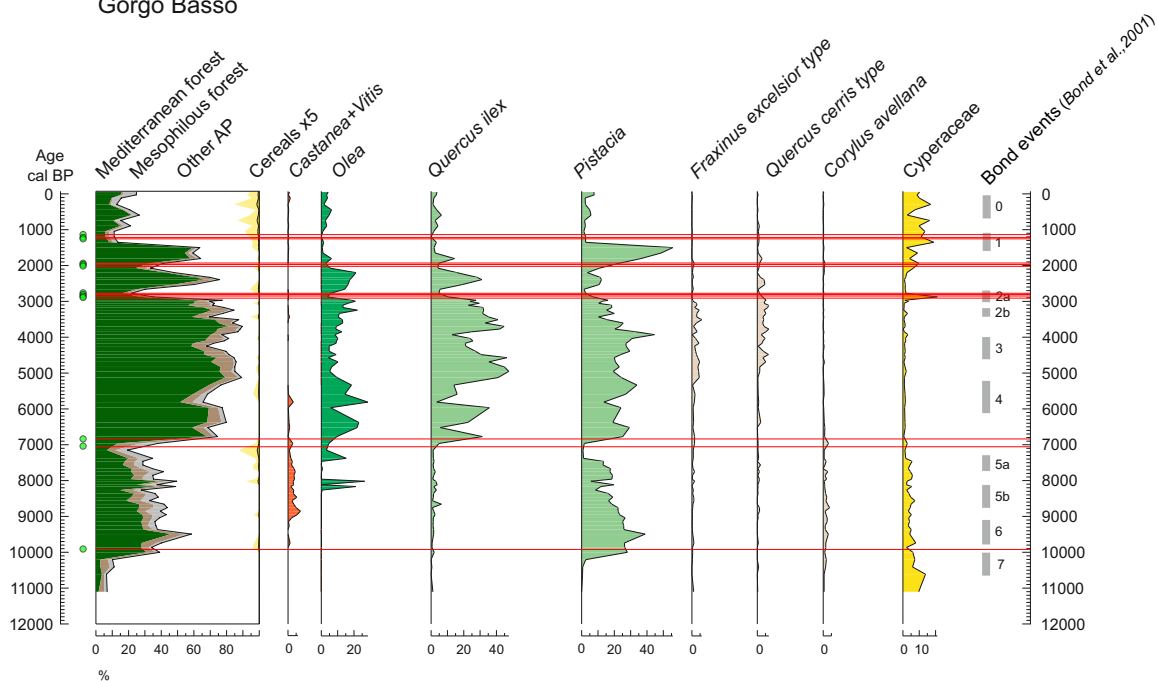

## Biviere di Gela

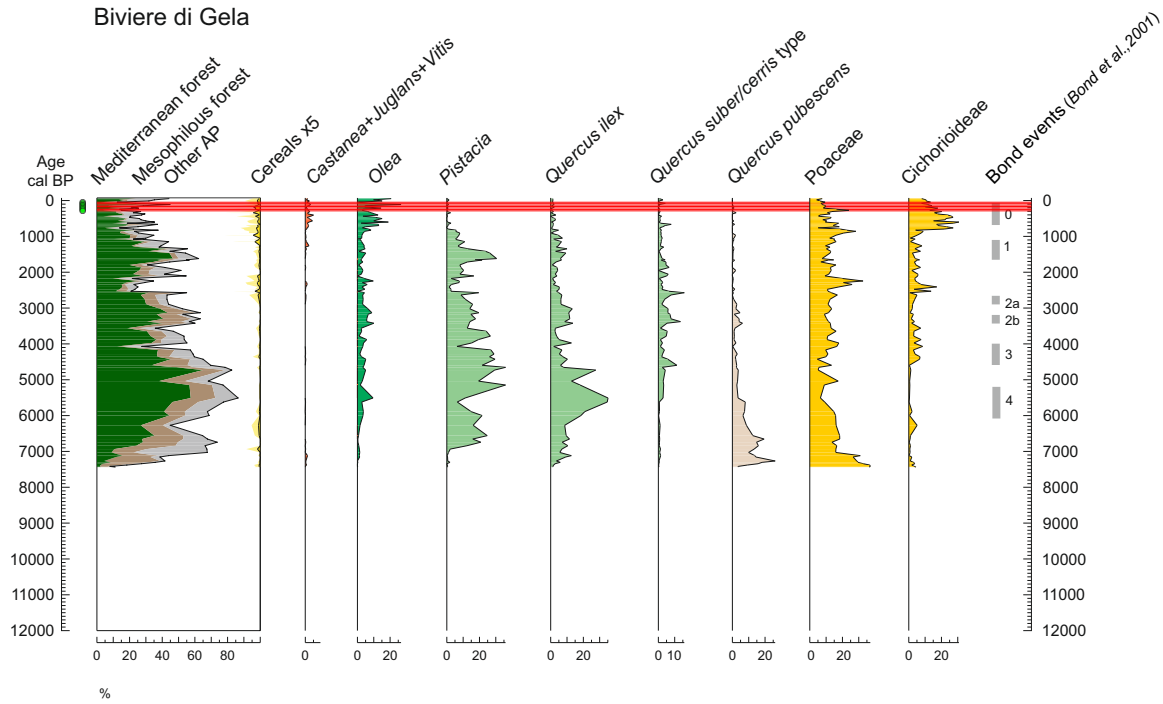

## SW104ND2-ND2

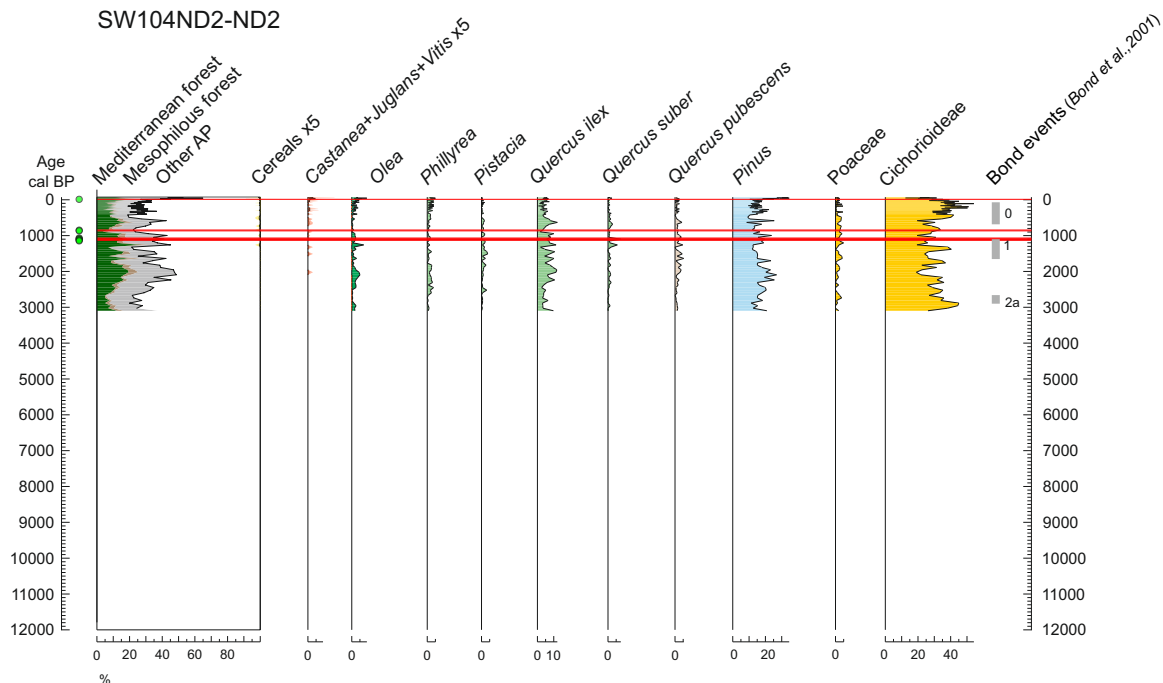

## Sardinia

## Baratz

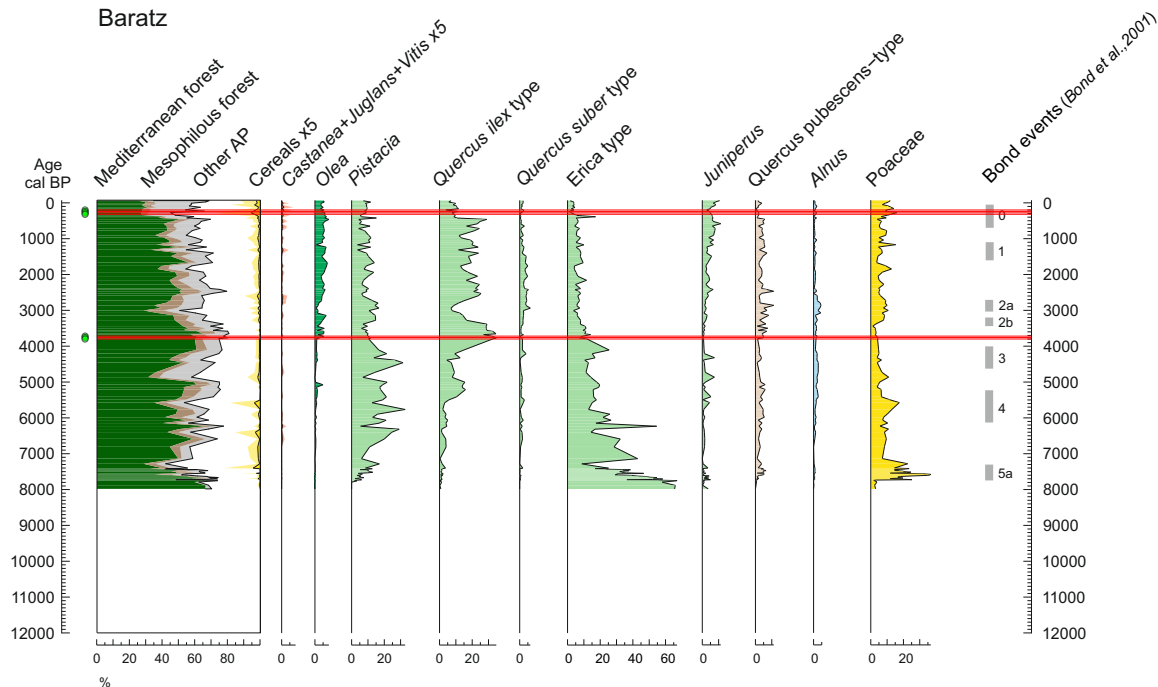

## Stagno di Chia

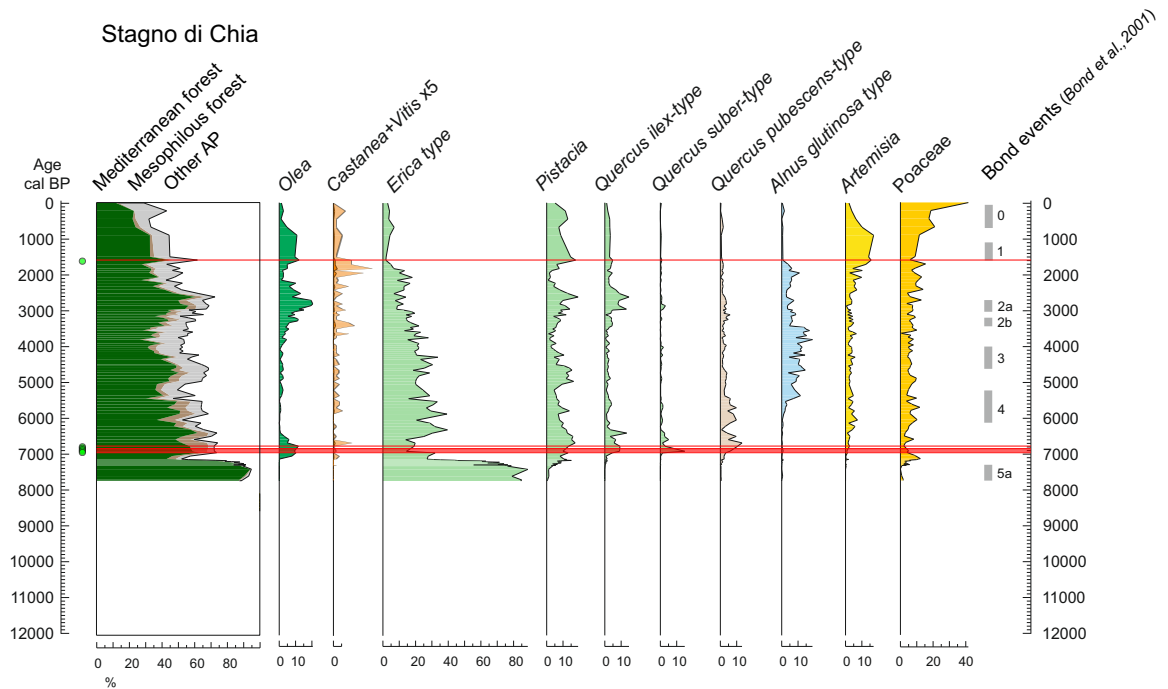

## Mistras

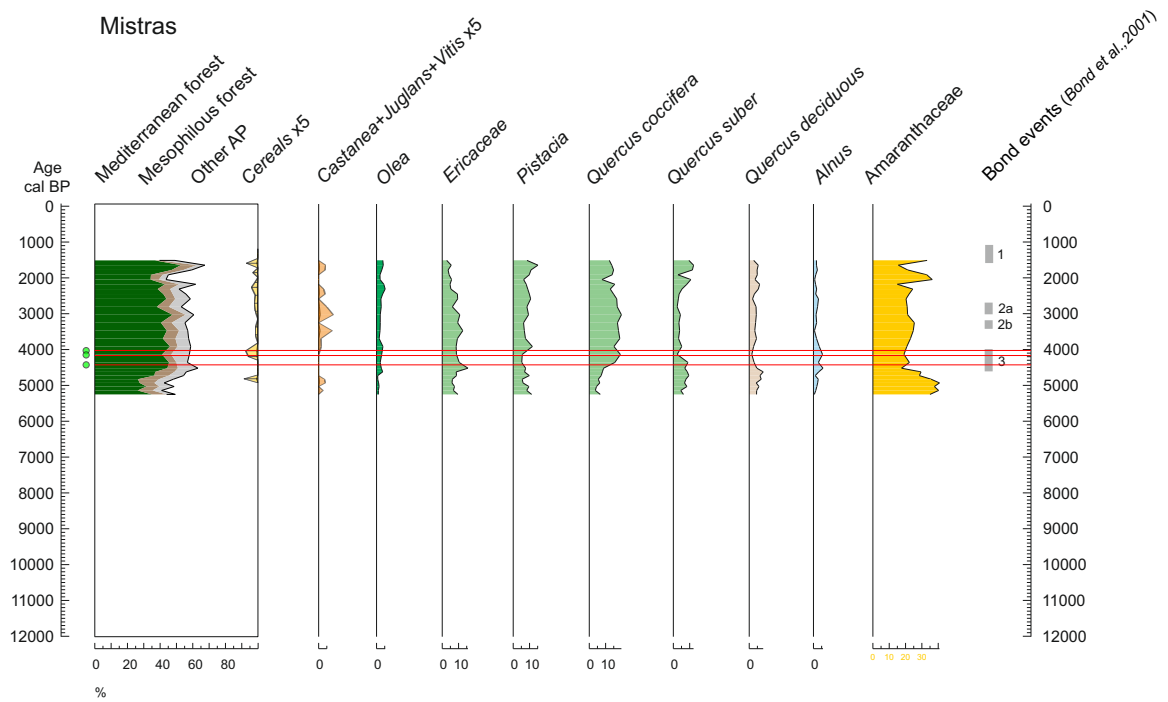

## Sa Curcurica

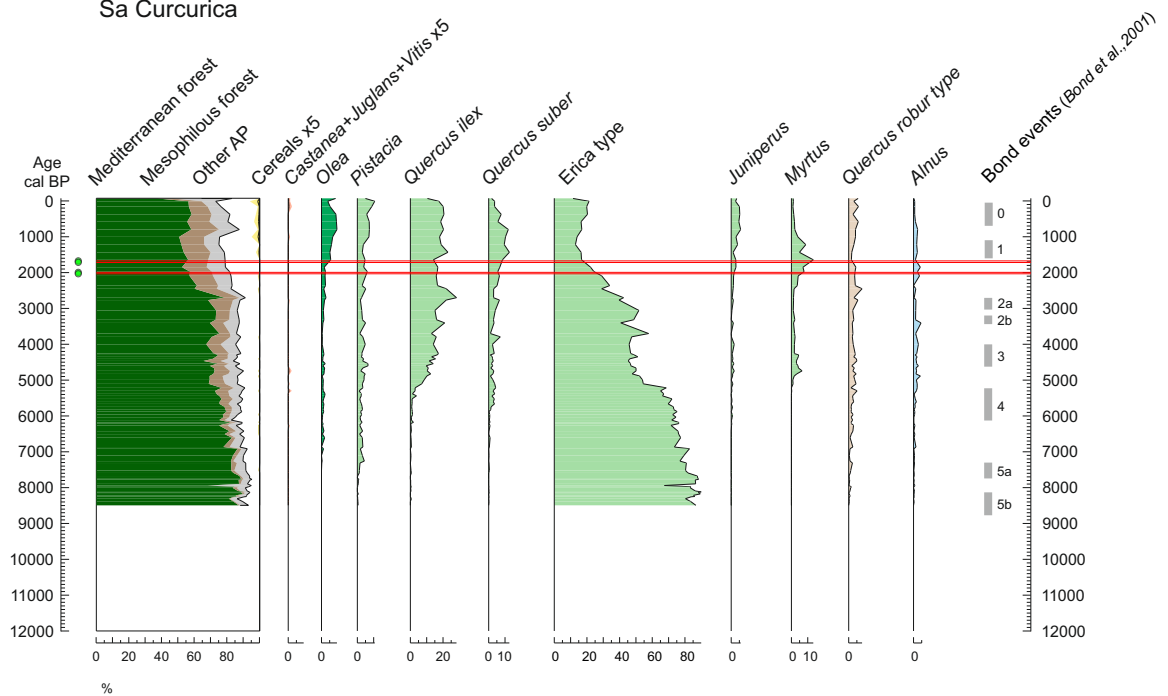

# Corsica

## Lac Creno 2

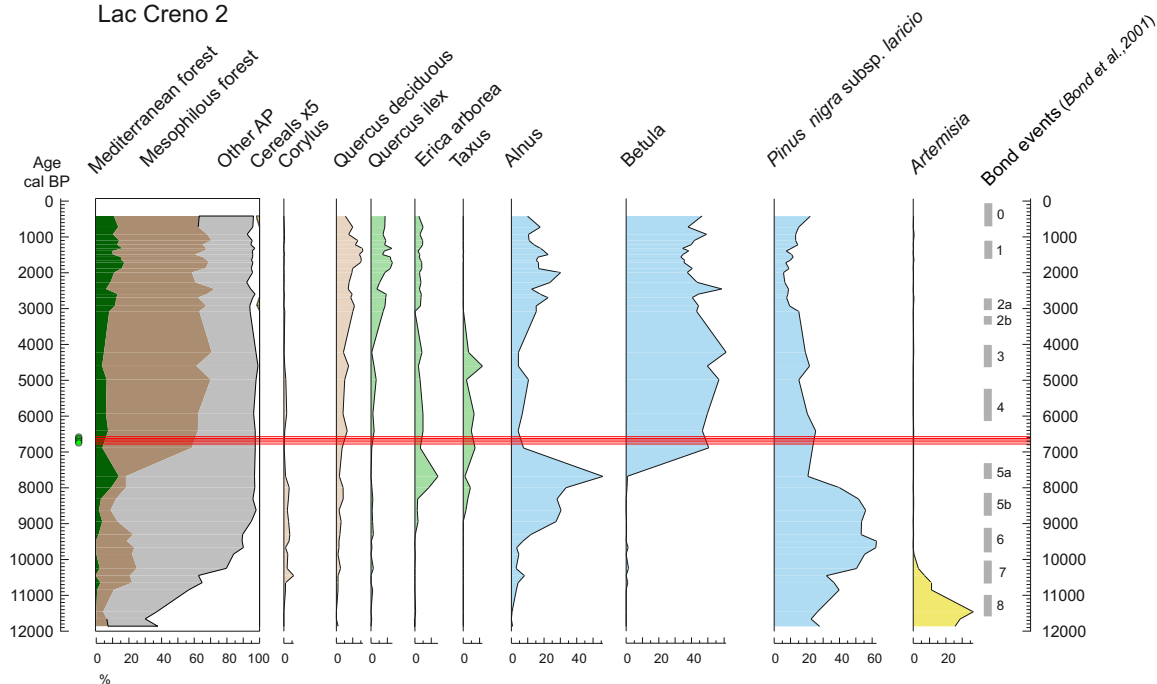

## Bastani

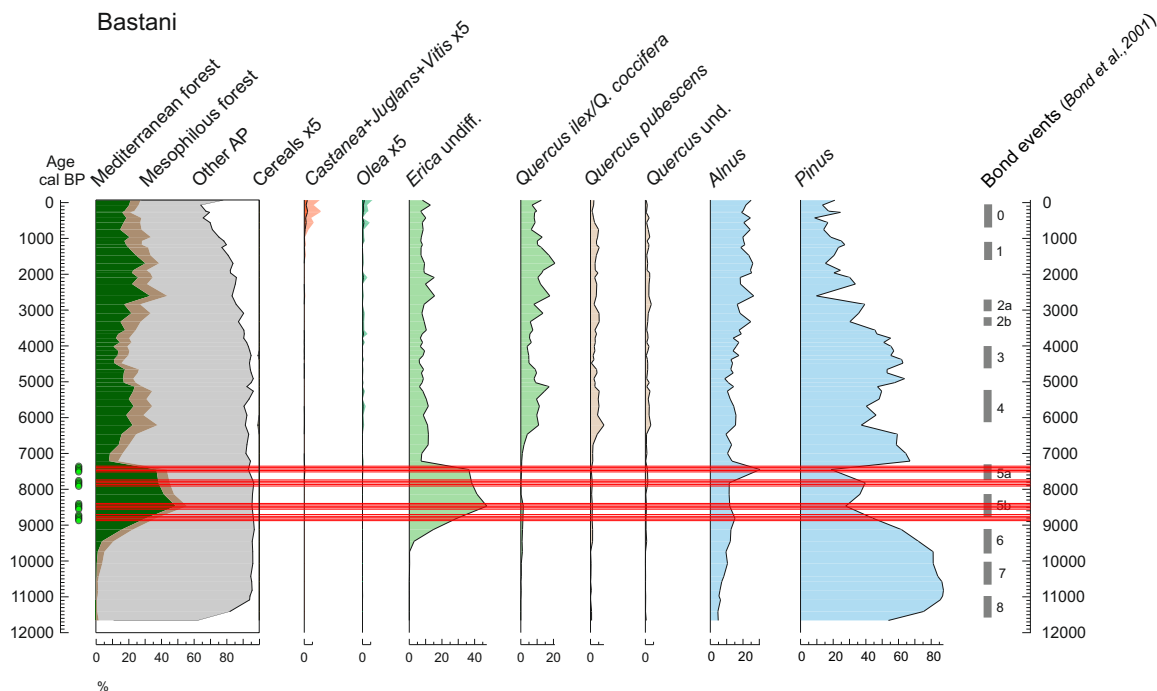

## Bergeries de Cavallara

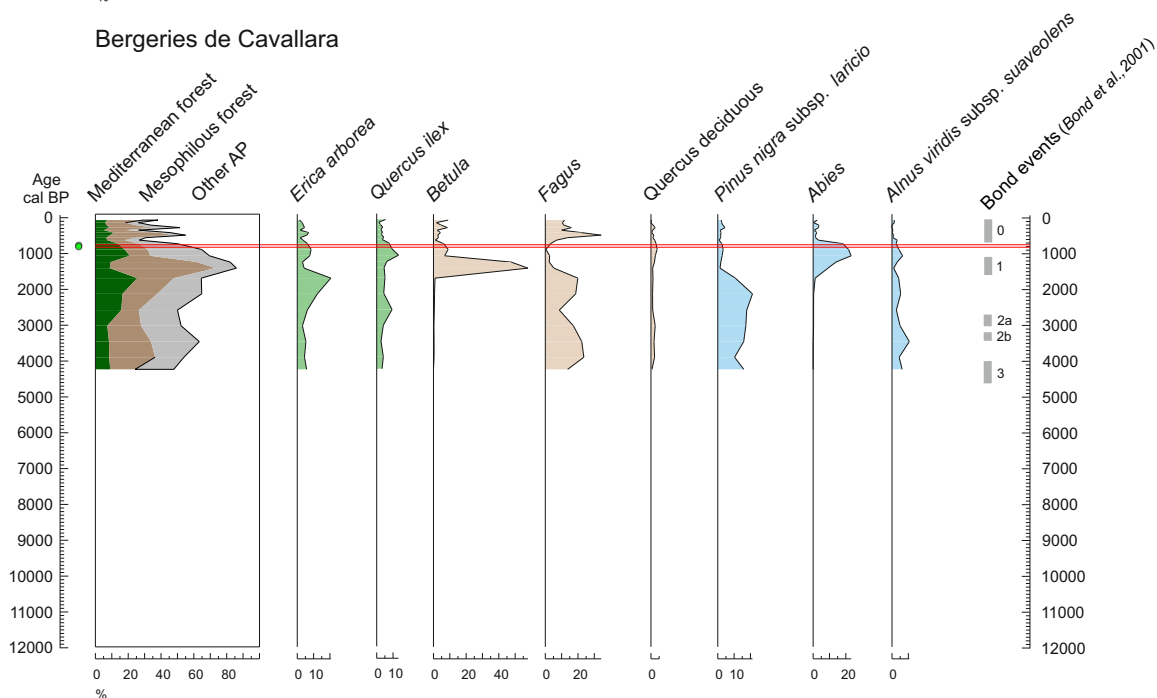

## Girolata 2

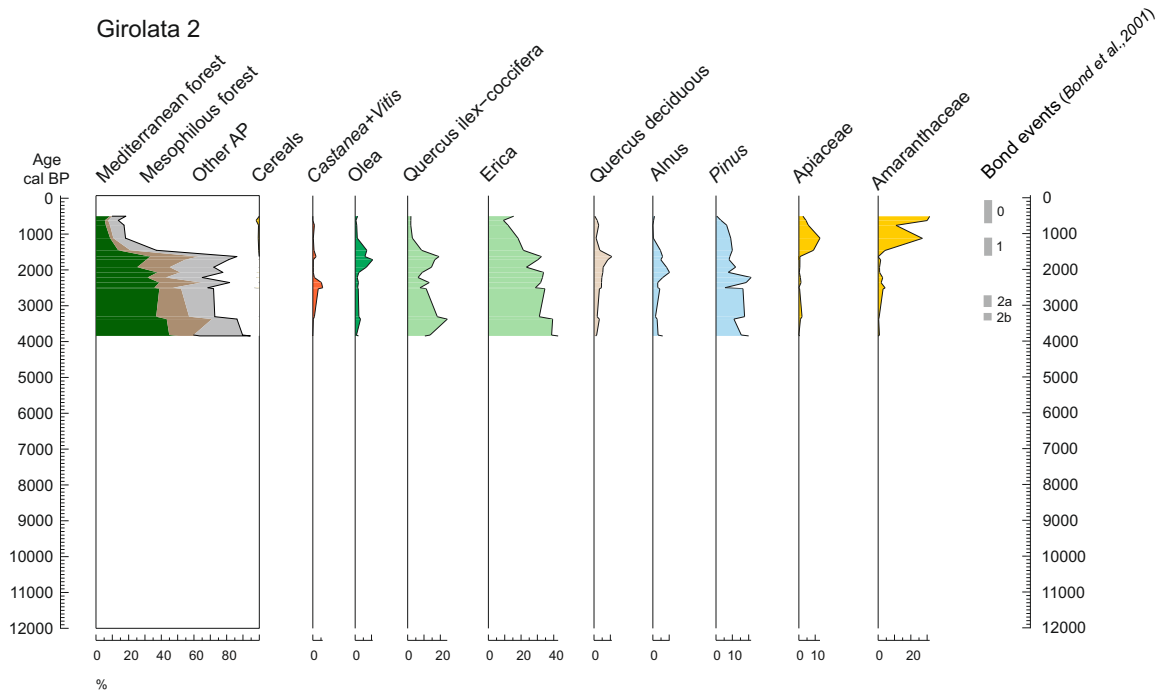

## Fangu

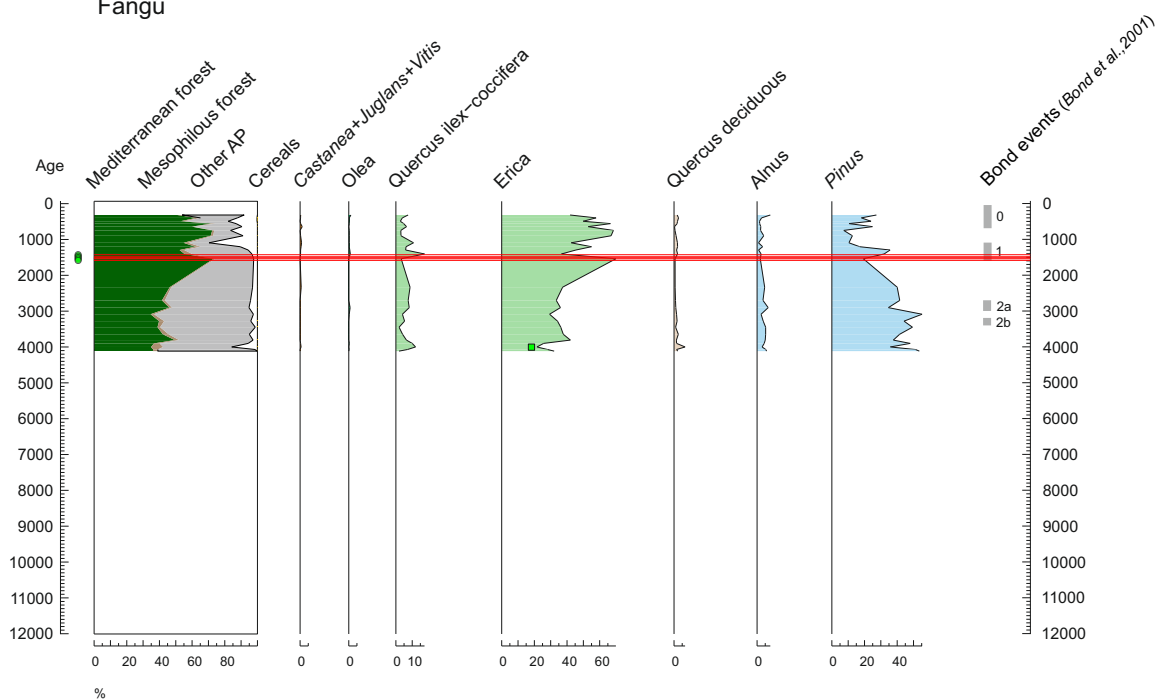

## Crovani

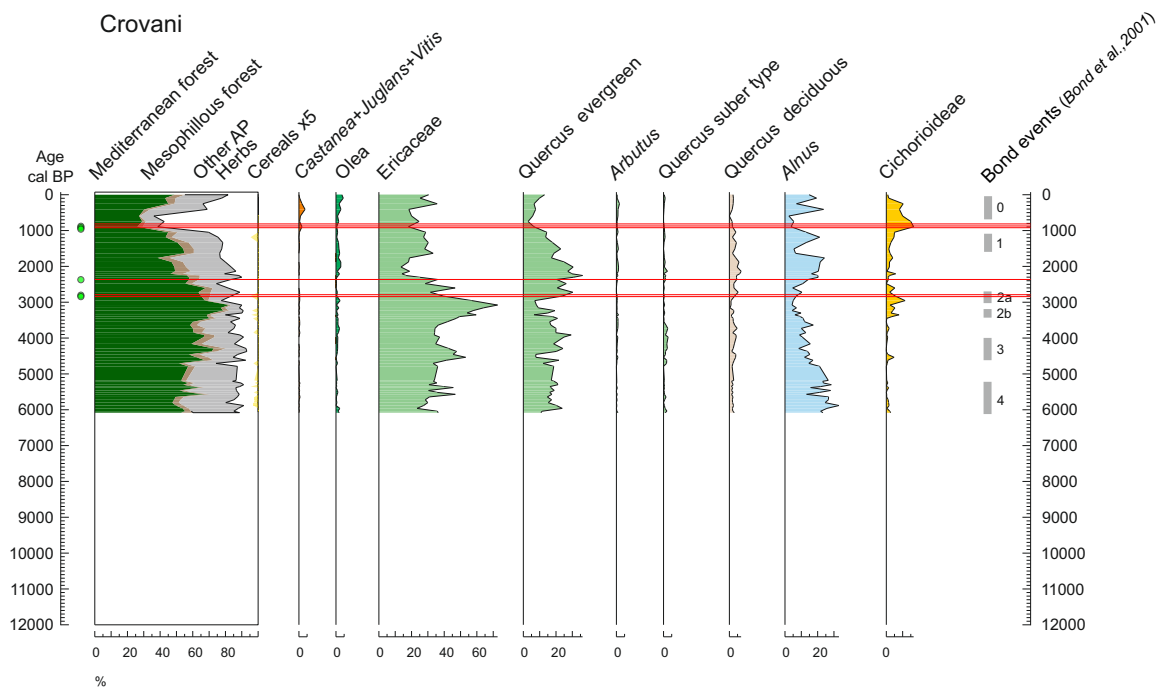

## Le Fango

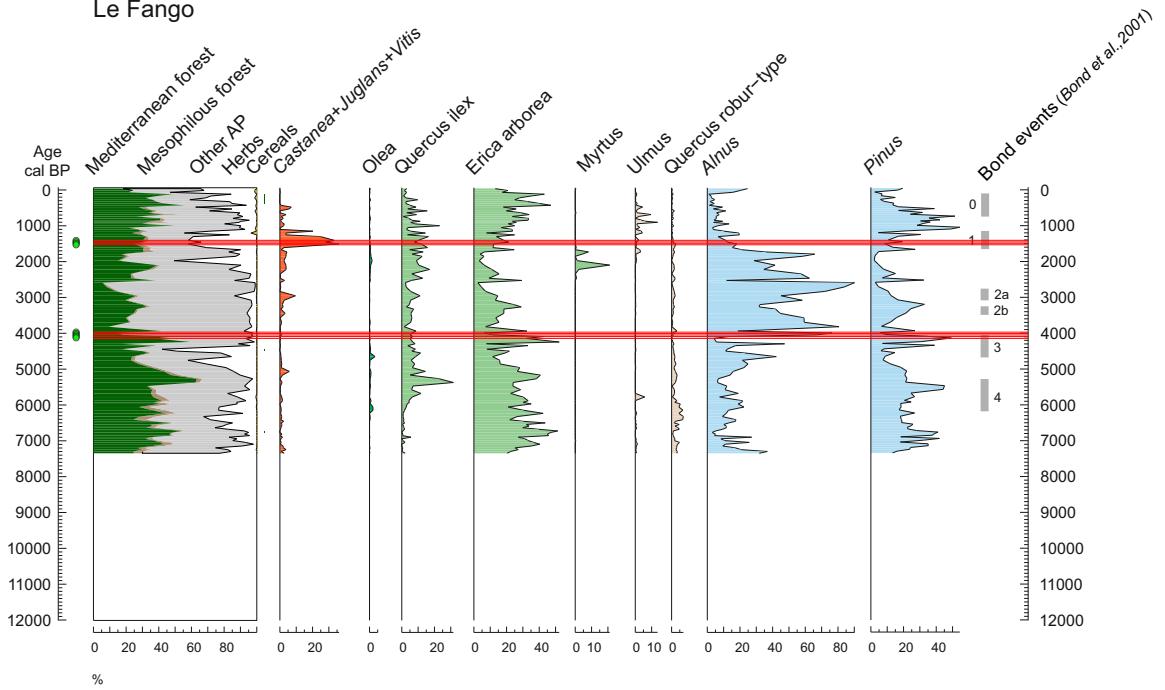

## Saleccia

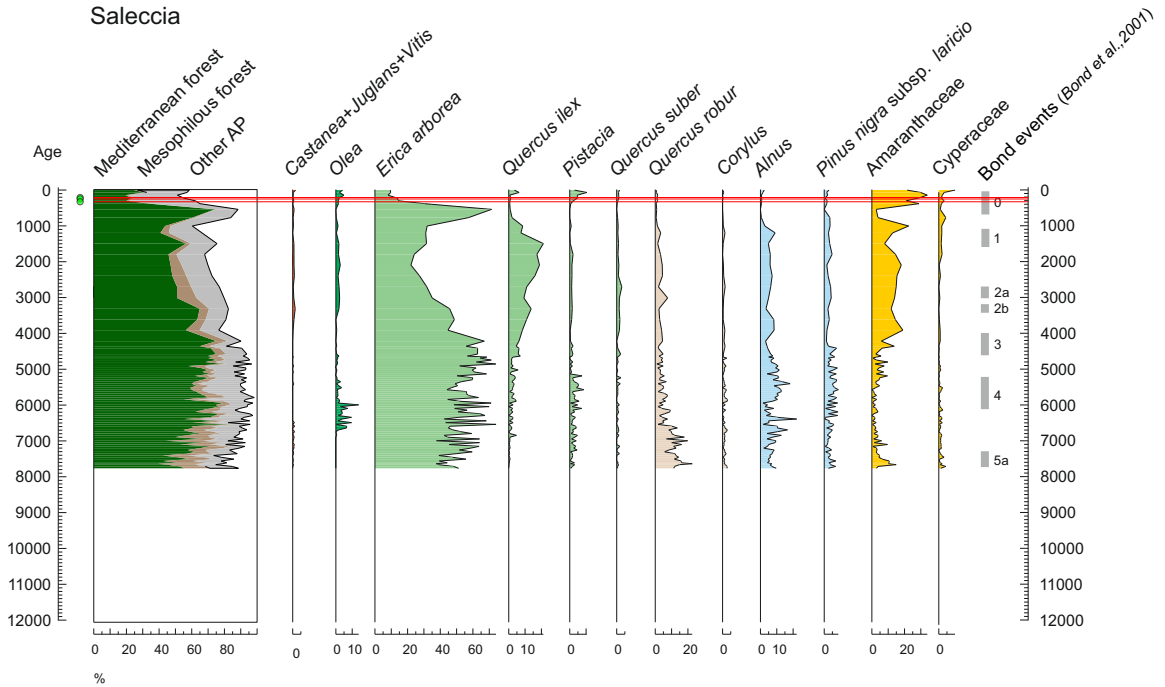

## Saint Florent

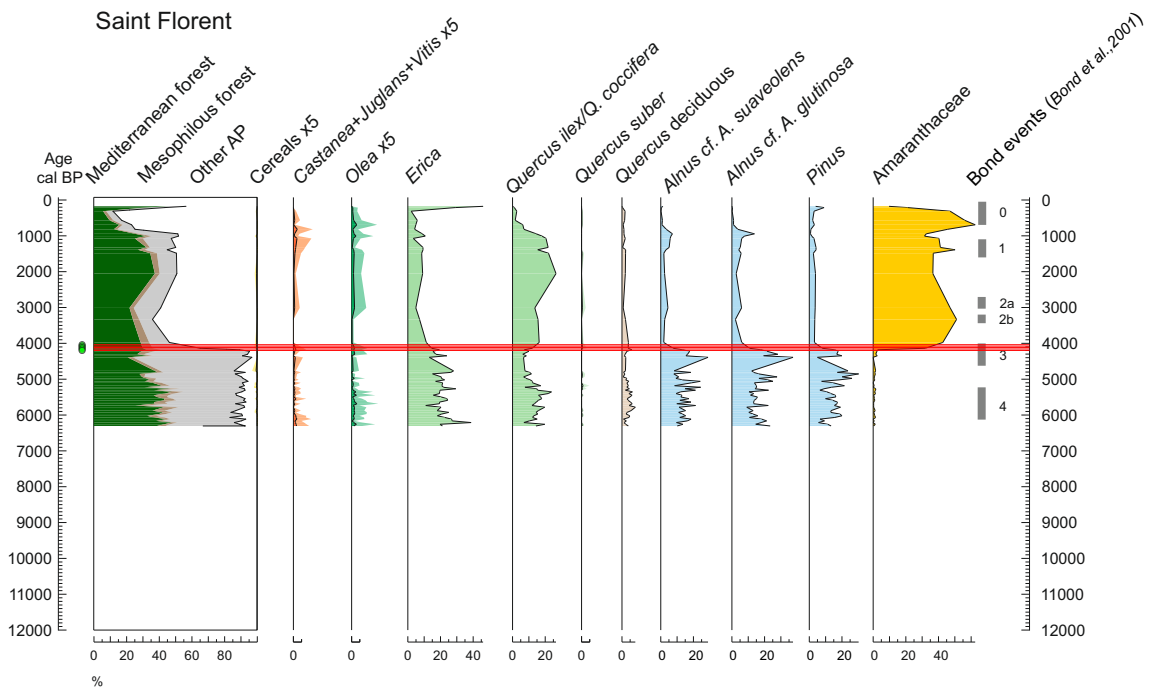



# Balearic Islands

POL12

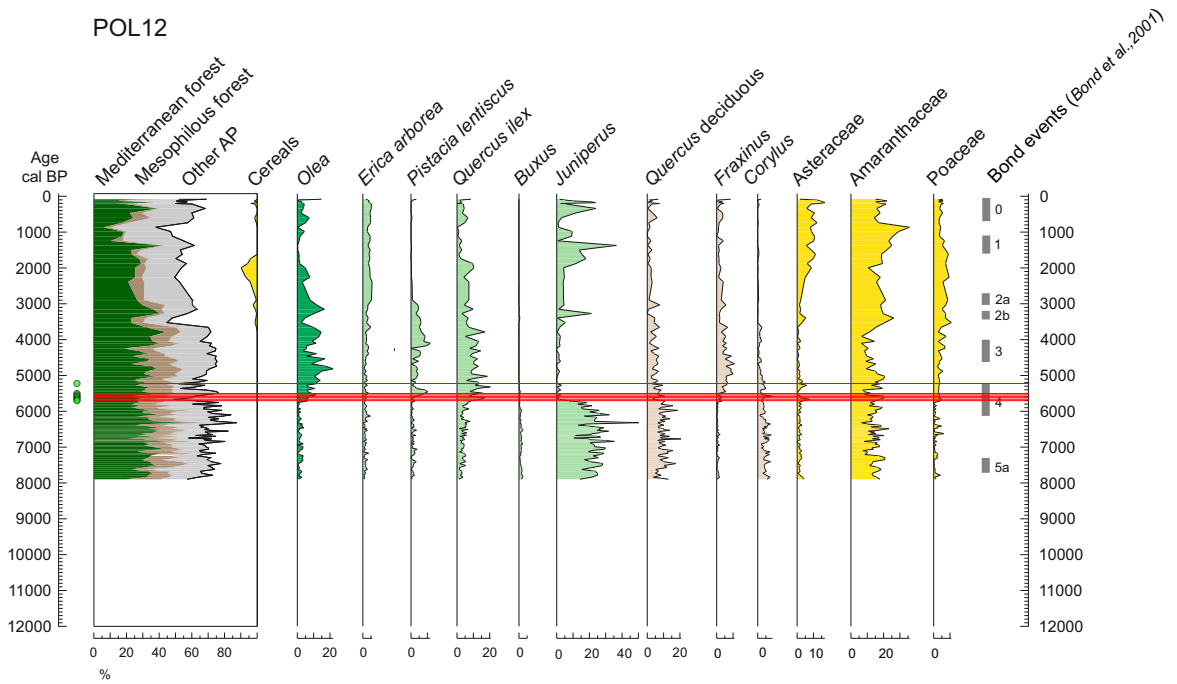

Es Grau

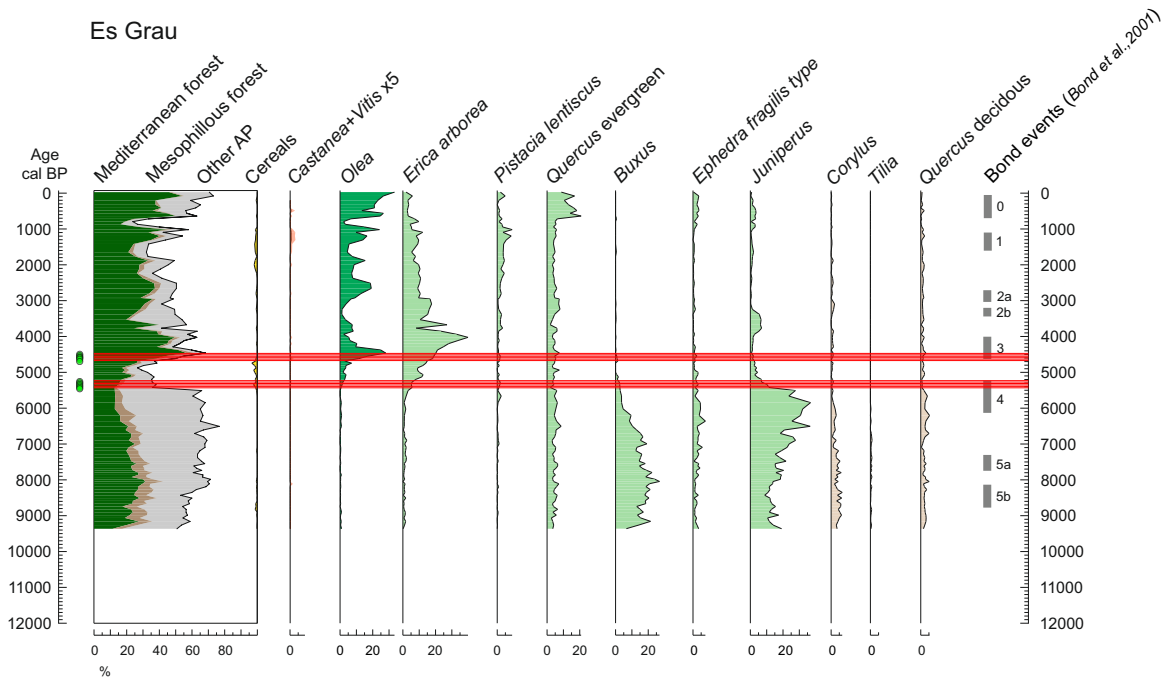

Algendar

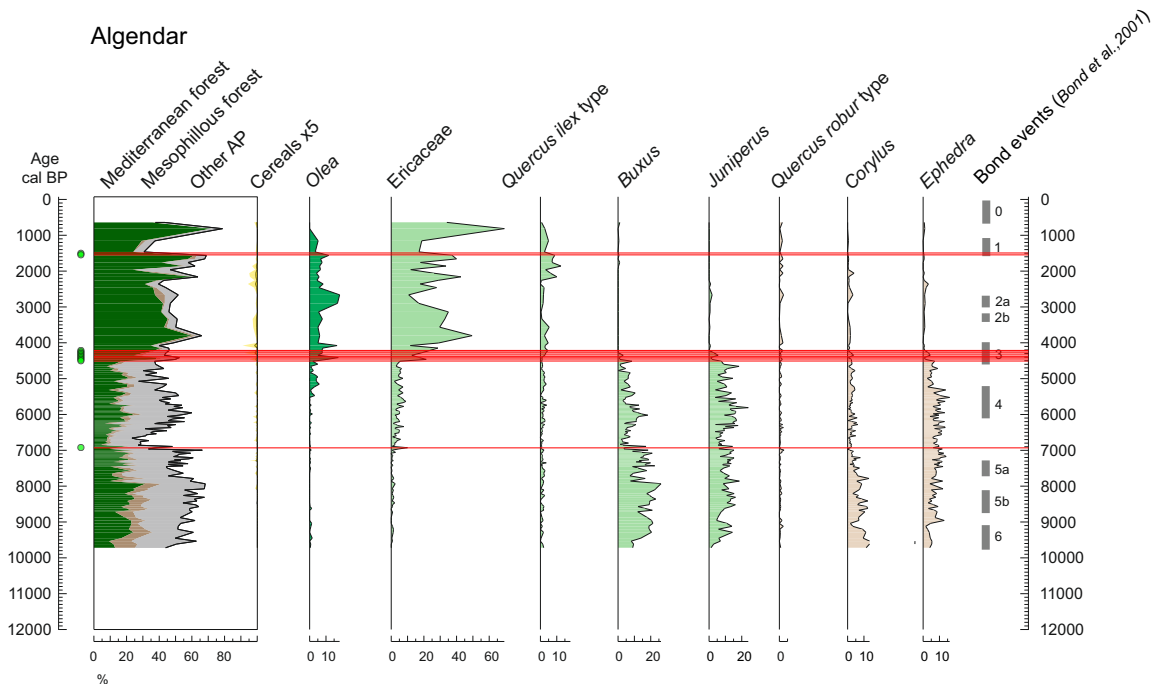

Cala'n Porter

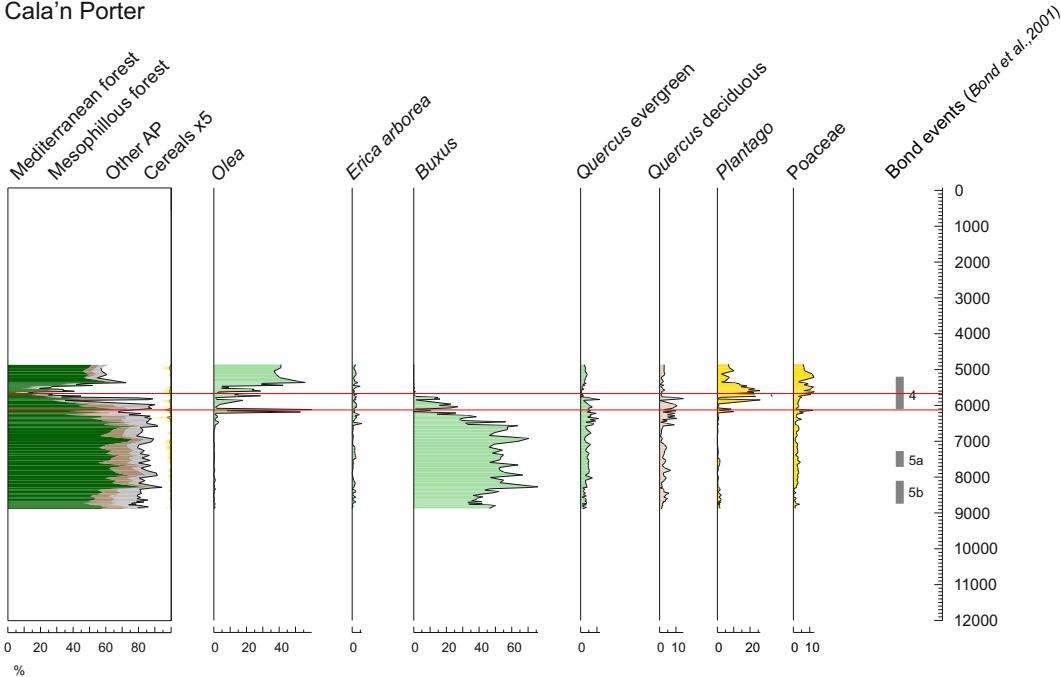

Supplement: s1 [file Figure S1_rev.pdf › Figure S1_rev.pdf]
